# Supplementary material for: Pyrene-Modified Cyclic Peptides Detect Cu2+ Ions by Fluorescence in Water
Source: MDPI journal article supplement (doi:10.3390/pr12040746), 2024-04-07
Supplement: s1 [file s1]

Archive with 1 entries (1 files):
- processes-2934050-supplementary.pdf
